# Supplementary material for: Neutral pH Fenton and photo-Fenton activity of Mo-doped iron-pyrite particles
Source: Royal Society of Chemistry journal article supplement (doi:10.1039/d4cp00793j), 2024-01-01
Supplement: d4cp00793j1.pdf [file d4cp00793j1.pdf]

***Neutral pH Fenton and Photo-Fenton activity of Mo-doped iron-pyrite particles.***

by

Maheswari Yadav<sup>1</sup>, Uttam Kumar<sup>1</sup>, Arup Kumar De<sup>1,2</sup>, and Indrajit Sinha<sup>1,\*</sup>

<sup>1</sup>Department of Chemistry,

Indian Institute of Technology (Banaras Hindu University),

Varanasi 221005, India

<sup>2</sup>Knowledge Resources & Information Technology Division,

CSIR-National Metallurgical Laboratory,

Jamshedpur-831007, India

\*Corresponding author email: [isinha.apc@iitbhu.ac.in](mailto:isinha.apc@iitbhu.ac.in)

## Table of Contents

1. Result and discussion
2. Reference

### 1. Result and discussion

**Table M1.** Lattice parameter of synthesized sample and their error calculations.

| S. No | Sample          | Instrument precision % | Reading error % | Calculation error % |
|-------|-----------------|------------------------|-----------------|---------------------|
| 1.    | Py              | 0.0253                 | 0.0017          | 0.0059              |
| 2.    | Py <sub>1</sub> | 0.0253                 | 0.0003          | 0.0009              |
| 3.    | Py <sub>4</sub> | 0.0253                 | 0.0010          | 0.0035              |
| 4.    | Py <sub>8</sub> | 0.0253                 | 0.0005          | 0.0016              |

$$\text{Instrument precision \%} = (\text{Standard deviation} / \text{Mean}) * 100$$

All errors are negligible in the lattice parameter calculation.

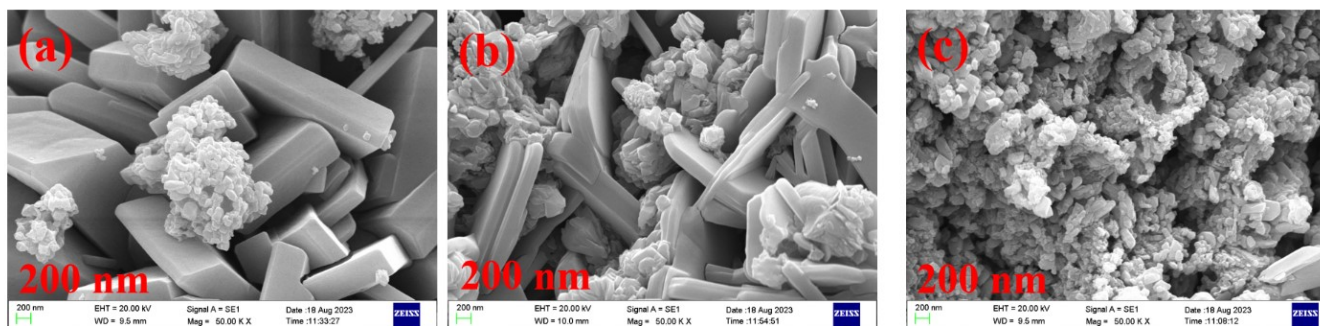

**Figure M1.** SEM images of (a) Py, (b) Py<sub>1</sub>, and (c) Py<sub>8</sub> samples.

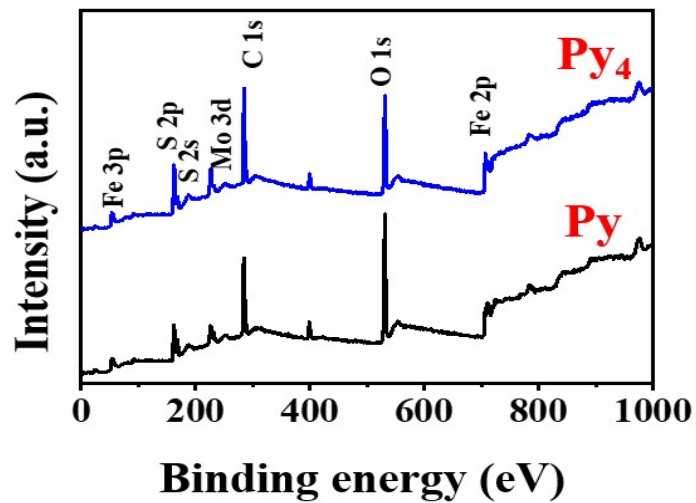

Figure M2. XPS Survey spectrum of Py and Py<sub>4</sub> samples.

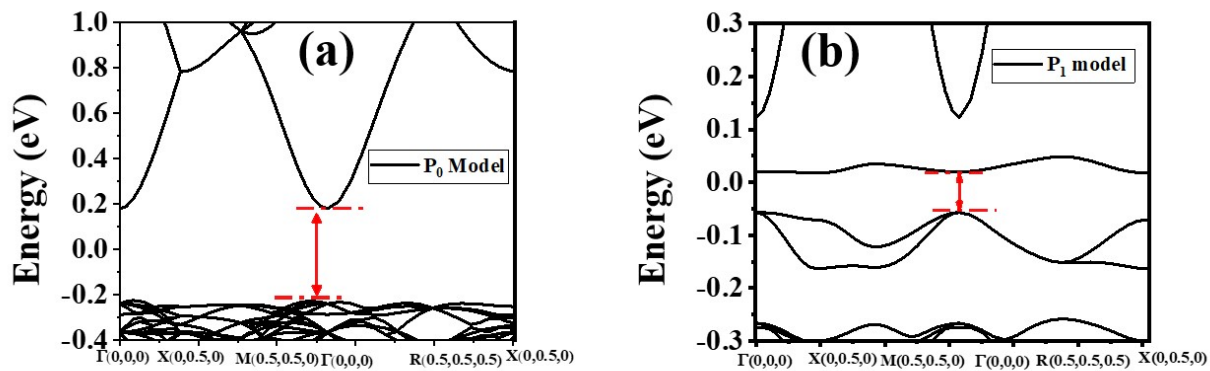

Figure M3. Band structure of (a) P<sub>0</sub> and (b) P<sub>1</sub> models.

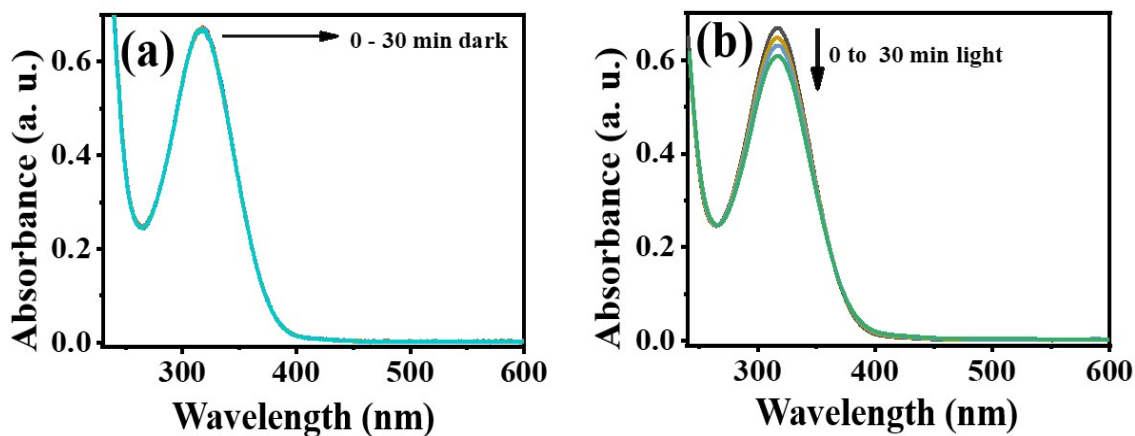

**Figure M4.** The effect of  $\text{H}_2\text{O}_2$  on PNP (a) in dark and (b) in light conditions without catalysts.

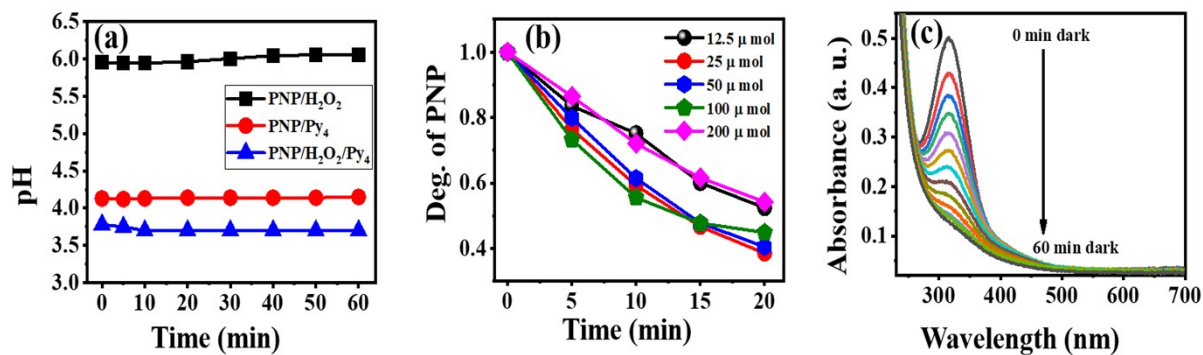

**Figure M5.** (a) pH v/s time plot of the degradation of PNP in the Fenton reaction, (b) degradation v/s time plot of PNP degradation in the Fenton reaction in the presence of different amounts of  $\text{H}_2\text{O}_2$ , and (c) UV-visible absorbance plot of PNP degradation in the presence of the Py catalyst.

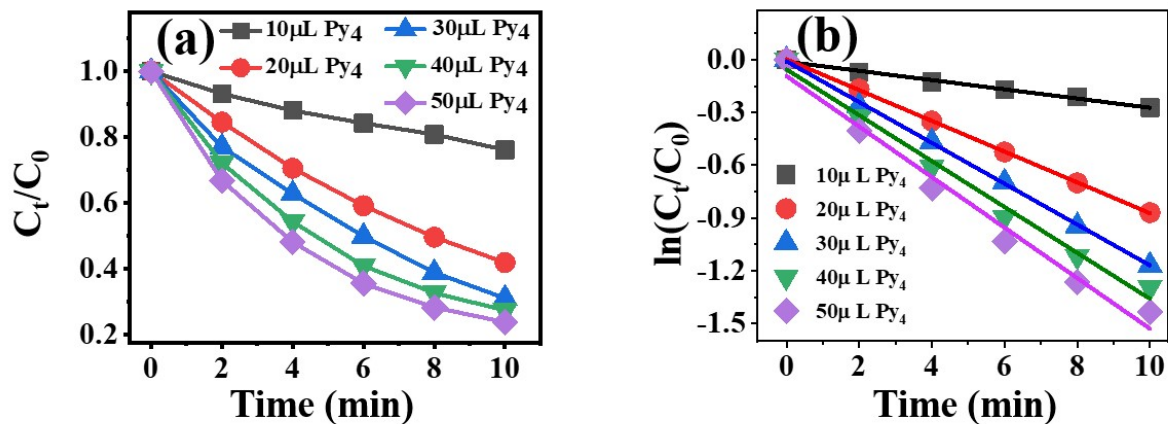

**Figure M6.** (a) degradation v/s time plot of PNP degradation in the photo-Fenton reaction in the presence of different amounts of Py<sub>4</sub> catalyst, and (b) kinetic plot of photo-Fenton reaction catalyst optimization, reaction conditions [PNP]=10 mg/L, [H<sub>2</sub>O<sub>2</sub>] = 25 μmol, [Py<sub>4</sub>] = 10, 20, 30, 40, and 50 μL of 2mg/2ml.

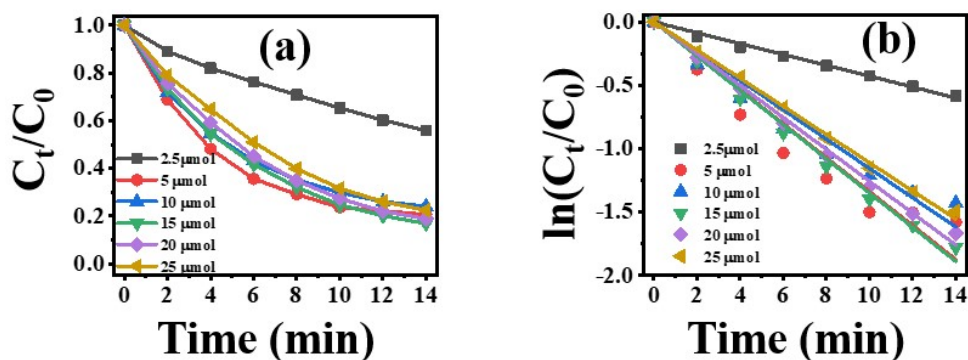

**Figure M7.** (a) Photo-Fenton PNP degradation versus time plots in the presence of different amounts of H<sub>2</sub>O<sub>2</sub>, and (b) photo-Fenton reaction with different amounts of H<sub>2</sub>O<sub>2</sub> follow first-order-kinetics (reaction condition [PNP]=10 mg/L, [Py<sub>4</sub>] = 30 μL of 2 mg/2ml).

## Kinetic studies

The pseudo-order kinetics equations were used because the concentration of H<sub>2</sub>O<sub>2</sub> was in excess (23.09 times higher than the PNP concentration) and accordingly treated as a constant during the reaction. The kinetics of a reaction can change with the catalyst. The different kinetics exhibited under Fenton and photo-Fenton conditions point to dissimilar mechanisms followed by the two types of reactions. Moreover, rate constants do not take in account the amount of catalysts used. Hence, rate constants cannot be used for comparing or evaluating the activity of a catalyst/photocatalyst. It must be mentioned here that TOF is a much better parameter for comparing and evaluating the activity of a catalyst/photocatalyst. TOF values give the reactant consumed in unit time per moles (or grams) of the catalyst. The data in Table M2 (supporting information) confirms that Pseudo-first-order kinetics plot fitting was considerable in PNP degradation in the photo-Fenton reaction <sup>1,2</sup>.

**Table M2.** Correlation coefficients of ( $R^2$ ) of the fitting of the PNP photo-Fenton degradation kinetics data to zero-order, first-order, and second-order kinetics equations.

| S. No | Photocatalyst   | Zero-order | First-order | Second-order |
|-------|-----------------|------------|-------------|--------------|
| 1.    | Py              | 0.8468     | 0.9957      | 0.9989       |
| 2.    | Py <sub>1</sub> | 0.8878     | 0.9825      | 0.9950       |
| 3.    | Py <sub>4</sub> | 0.9425     | 0.9873      | 0.9972       |
| 4.    | Py <sub>8</sub> | 0.9956     | 0.9963      | 0.9992       |

**Table M3.** Normalized recyclability and TOF of PNP degradation in Fenton and photo-Fenton reactions.

| Cycles of Py <sub>4</sub> | Fenton degradation (%) | TOF ( $\mu\text{mol g}^{-1} \text{min}^{-1}$ ) | Photo-Fenton degradation (%) | TOF ( $\mu\text{mol g}^{-1} \text{min}^{-1}$ ) |
|---------------------------|------------------------|------------------------------------------------|------------------------------|------------------------------------------------|
| 1                         | 68.00                  | 6.52                                           | 93.39                        | 13.37                                          |
| 2                         | 64.75                  | 6.46                                           | 88.87                        | 12.91                                          |
| 3                         | 50.10                  | 6.40                                           | 84.15                        | 12.90                                          |
| 4                         | 21.69                  | 4.16                                           | 76.63                        | 12.81                                          |

Table M3, in the supporting information of the revised manuscript, gives the complete recyclability data for sample Py<sub>4</sub>. Columns 2 and 4 give the percentage PNP degradation on the catalyst under (dark) Fenton and (visible light) photo-Fenton conditions. Note that the data in columns 2 and 4 give the percentage degradation due to the catalyst recovered after each cycle of use. There is some catalyst loss during the washing and drying of the recovered catalyst. Hence, the decrease in columns 2 and 4 (Fenton and photo-Fenton) activity is also due to catalyst loss. In contrast, columns 3 and 5 give the PNP degradation TOF values obtained on the Py<sub>4</sub> catalyst under Fenton and photo-Fenton conditions respectively. The TOF has  $\mu\text{mol. g}^{-1}.\text{min}^{-1}$  unit and it is giving the PNP degradation activity per gram of the catalyst. The TOF catalyst activity is considerably better than those displayed in columns 2 and 4.

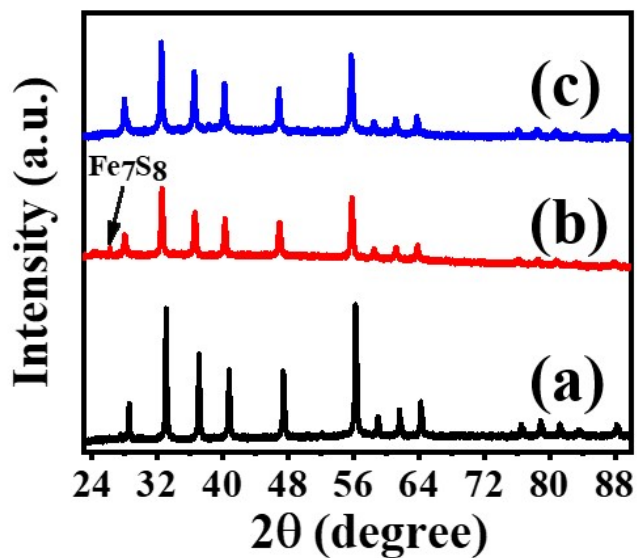

**Figure M8.** XRD pattern of (a) Py<sub>4</sub> (b) and (c) are after the 4<sup>th</sup> cycle Py<sub>4</sub> in Fenton and photo-Fenton reaction respectively.

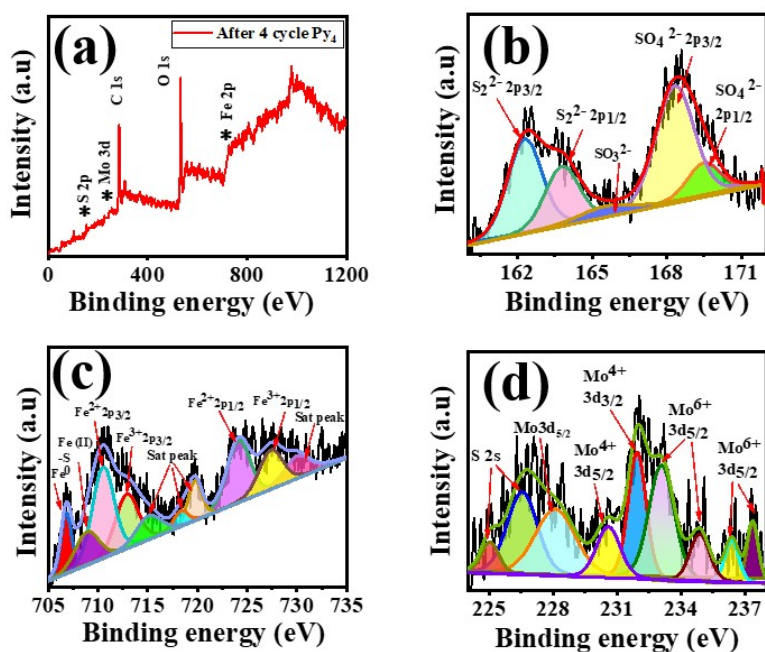

**Figure M 9.** After 4 cycles used Py<sub>4</sub> photocatalyst XPS spectra, (a) survey spectrum, core level XPS spectra of (b) S 2p, (c) Fe 2p, and (d) Mo 3d.



| S. No | Sample                                           | TOF ( $\mu$ mole $\text{g}^{-1} \text{min}^{-1}$ ) | $\text{H}_2\text{O}_2$ Normalized TOF (HTOF) ( $\text{mg}^{-1} \text{min}^{-1} \text{L}$ ) | $\text{H}_2\text{O}_2$ (mM) | Reusability                      | Ref.      |
|-------|--------------------------------------------------|----------------------------------------------------|--------------------------------------------------------------------------------------------|-----------------------------|----------------------------------|-----------|
| 1     | Pyrite<br>(pH=7)                                 | *71.88                                             | 8.98                                                                                       | 8.00                        | 30 % in 3 <sup>rd</sup> cycle    | 3         |
| 2     | $\text{Mn}_3\text{O}_4\cdot\text{CuO}$<br>(pH~7) | *8.53                                              | 0.08                                                                                       | 100                         | 78 % in 5 <sup>th</sup> cycle    | 4         |
| 3.    | $\text{Py}_4$<br>(pH~7)                          | 113.16                                             | 13.58                                                                                      | 8.33                        | 65.88 % in 4 <sup>th</sup> cycle | This work |

**Table M4.** PNP Fenton degradation comparison with different catalysts.

**Table M5.** A comparison of PNP photo-Fenton degradation over different catalysts.

| S. No | Sample                                                                              | TOF ( $\mu\text{mol g}^{-1} \text{min}^{-1}$ ) | $\text{H}_2\text{O}_2$ Normalized TOF (HTOF) ( $\text{mg}^{-1} \text{min}^{-1} \text{L}$ ) | Light source                                | $\text{H}_2\text{O}_2$ (mM) | Reusability                      | Ref |
|-------|-------------------------------------------------------------------------------------|------------------------------------------------|--------------------------------------------------------------------------------------------|---------------------------------------------|-----------------------------|----------------------------------|-----|
| 1     | $\text{Zn}_{1-1.5x}\text{Fe}_x\text{S}_x$<br>/g- $\text{C}_3\text{N}_4$<br>(pH=6.1) | *1.43                                          | 1.43                                                                                       | 500-W Xenon lamp ( $29.3\text{mWcm}^{-2}$ ) | 1.00                        | 76.90 % in 5 <sup>th</sup> cycle | 5   |
| 2     | MIL-100                                                                             | *95.84                                         | 114.09                                                                                     | 300 W Mercury Lamp                          | 0.84                        | 100 % in                         | 6   |

|   |                           |         |        |                                                                                      |      |                                        |              |
|---|---------------------------|---------|--------|--------------------------------------------------------------------------------------|------|----------------------------------------|--------------|
|   | /Fe (pH=7)                |         |        |                                                                                      |      | 5 <sup>th</sup> cycle                  |              |
| 3 | Pyrite<br>(pH=7)          | *179.71 | 22.46  | 300W Xenon lamp<br>with light cut filter<br>( $\lambda > 400$ or $\lambda > 420$ nm) | 8.00 | 85 % in<br>3 <sup>rd</sup> cycle       | 1            |
| 4 | Fe–TiO <sub>2</sub>       | *23.96  | 4.89   | UV lamp, 340 nm<br>(100 $\mu$ W cm <sup>-2</sup> )                                   | 4.90 | 90 % in<br>4 <sup>th</sup> cycle       | 7            |
| 5 | Py <sub>4</sub><br>(pH=7) | 254.50  | 152.39 | White cool LED                                                                       | 1.67 | 95.12 %<br>in 4 <sup>th</sup><br>cycle | This<br>work |

\*All catalyst turnover frequency was calculated by the information given in the cited research articles.

## 2. References

- (1) A. K. Hassan, M.A. Atiya, Z. A. Mahmoud, Photo-Fenton-like Degradation of Direct Blue 15 Using Fixed Bed Reactor Containing Bimetallic Nanoparticles: Effects and Box–Behnken Optimization, *Environ Technol Innov* 2022, **28**, 102907.
- (2) M. B. K. Suhan, S.M.T. Mahtab, W. Aziz, S. Akter, M. S. Islam, Sudan Black B Dye Degradation in Aqueous Solution by Fenton Oxidation Process: Kinetics and Cost Analysis, *Case Studies in Chemical and Environmental Engineering*, 2021, **4**, 100126.

- (3) L. Zeng, J. Gong, J. Dan, S. Li, J. Zhang, W. Pu, and C. Yang, Novel visible light enhanced pyrite-Fenton system toward ultrarapid oxidation of p-nitrophenol: catalytic activity, characterization and mechanism, *Chemosphere*, 2019, **228**, 232–240.
- (4) M. Nekoeinia, S. Yousefinejad, F. Hasanpour, and M. Yousefian-Dezaki, Highly efficient catalytic degradation of p-nitrophenol by  $\text{Mn}_3\text{O}_4\cdot\text{CuO}$  nanocomposite as a heterogeneous Fenton-like catalyst, *J. Exp. Nanosci.*, 2020, **15 (1)**, 322–336.
- (5) Q. Wang, P. Wang, P. Xu, Y. Li, J. Duan, G. Zhang, L. Hu, X. Wang, and W. Zhang, Visible-light -driven photo- Fenton reaction using  $\text{Zn}_{1-1.5x}\text{Fe}_x\text{S}/\text{g-C}_3\text{N}_4$  photocatalyst: Degradation kinetics and mechanisms analysis, *Appl. Catal. B.*, 2020, **266**, 118653.
- (6) T. Tang, B. Jin, P. Zhao, Preparation of the photo-Fenton agent MIL-100 (Fe) with high performance in the degradation of nitro explosives, *New J Chem.*, 2023, **47(18)**, 8566–8577.
- (7) B. Zhao, G. Mele, I. Pio, J. Li, L. Palmisano, G. Vasapollo, Degradation of 4-Nitrophenol (4-NP) Using  $\text{Fe-TiO}_2$  as a Heterogeneous Photo-Fenton Catalyst, *J. Hazard. Mater.*, 2010, **176 (1–3)**, 569–574.
